# Supplementary material
Source: Springer Nature journal article supplement (https://www.springermedizin.de/resource/supplementary/12874_2012_831_MOESM3_ESM.pdf/9432752)
Supplement: MOESM3 [file 9432752]

**Table 2:** Comparison of electronic versus self-reported adherence by age group, sex, time in study and cognition.

| Subgroup      |                   | Possible Days | Electronic Adherence |                    | Self-Reported Adherence    |                    |
|---------------|-------------------|---------------|----------------------|--------------------|----------------------------|--------------------|
|               |                   |               | Days Recorded*       | Mean ( $\pm$ SD)   | Days Reported <sup>†</sup> | Mean ( $\pm$ SD)   |
| Overall       |                   | 42,098        | 31,902               | 0.76 ( $\pm$ 0.23) | 32,678                     | 0.78 ( $\pm$ 0.23) |
| Age Group     | Age < 84          | 22,001        | 17,271               | 0.78 ( $\pm$ 0.20) | 17,496                     | 0.79 ( $\pm$ 0.19) |
|               | Age $\geq$ 84     | 20,097        | 14,631               | 0.74 ( $\pm$ 0.26) | 15,182                     | 0.77 ( $\pm$ 0.26) |
| Gender        | Male              | 14,680        | 10,969               | 0.76 ( $\pm$ 0.25) | 11,247                     | 0.78 ( $\pm$ 0.26) |
|               | Female            | 27,418        | 20,933               | 0.76 ( $\pm$ 0.22) | 21,431                     | 0.78 ( $\pm$ 0.21) |
| Time in Study | 6 - <9 Months     | 6,830         | 5,378                | 0.79 ( $\pm$ 0.22) | 5,440                      | 0.80 ( $\pm$ 0.22) |
|               | 9 - <12 Months    | 7,452         | 5,358                | 0.73 ( $\pm$ 0.27) | 5,622                      | 0.76 ( $\pm$ 0.26) |
|               | 12 Months         | 27,816        | 21,166               | 0.76 ( $\pm$ 0.22) | 21,616                     | 0.78 ( $\pm$ 0.22) |
| Short Blessed | < 2 (Median)      | 17,889        | 14,001               | 0.78 ( $\pm$ 0.20) | 14,287                     | 0.80 ( $\pm$ 0.19) |
| Test Score    | $\geq$ 2 (Median) | 24,209        | 17,901               | 0.75 ( $\pm$ 0.25) | 18,391                     | 0.77 ( $\pm$ 0.25) |

\*refers to the actual number of days recorded using the electronic monitor

<sup>†</sup>refers to actual number of days recorded as being adherent on the self-reported log book
